# Supplementary material for: Unraveling essential cellulosomal components of the (Pseudo)Bacteroides cellulosolvens reveals an extensive reservoir of novel catalytic enzymes
Source: PubMed Central journal article supplement (PMC6507058; doi:10.1186/s13068-019-1447-2), 2019-05-09
Supplement: 13068_2019_1447_MOESM2_ESM.pdf [file 13068_2019_1447_MOESM2_ESM.pdf]

## Additional file 2

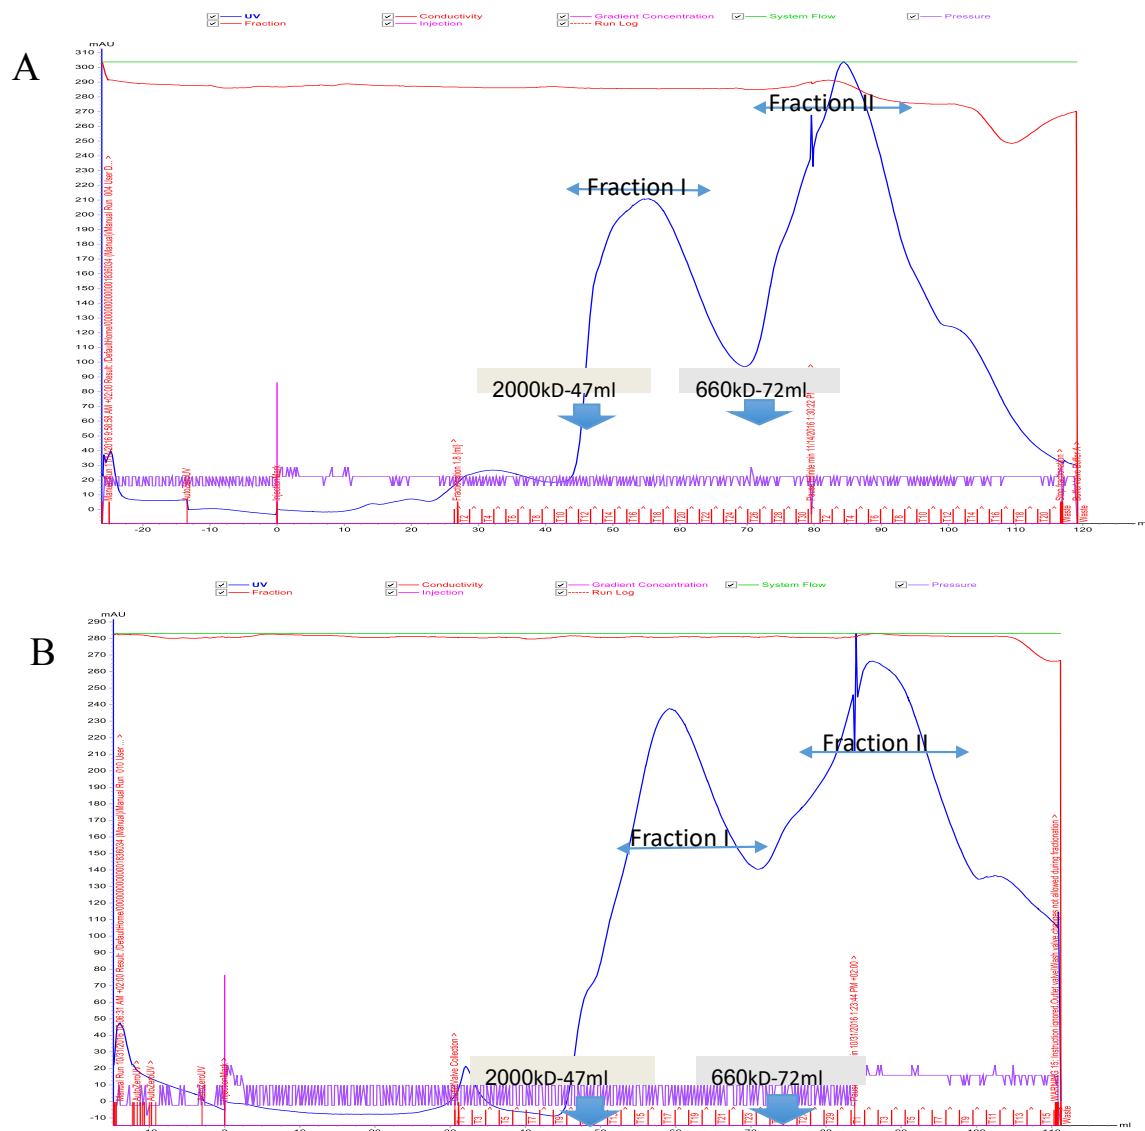

**Figure S1. Chromatographic profile of cellulosomal high-molecular-weight fractions.** Gel filtration of supernatant fluids from *B. cellulosolvans* cells grown on two carbon sources: A, cellobiose and B, microcrystalline cellulose. After concentration, the supernatant fluids were loaded onto a Superose 6 Increase gel filtration column. Two major peaks were obtained during the gel filtration process for both substrates. Examination of the peaks revealed two different populations of high-molecular-weight protein complexes that were active on CMC. The column was calibrated using blue dextran and thyroglobulin.
