# Supplementary material for: Unraveling essential cellulosomal components of the (Pseudo)Bacteroides cellulosolvens reveals an extensive reservoir of novel catalytic enzymes
Source: PubMed Central journal article supplement (PMC6507058; doi:10.1186/s13068-019-1447-2), 2019-05-09
Supplement: 13068_2019_1447_MOESM4_ESM.pdf [file 13068_2019_1447_MOESM4_ESM.pdf]

**Additional file 4: Table S3. Mass spectrometry analysis of normalized celulosomal proteins.**

The intensities of all the proteins in four celulosomal fractions (CB I, CB II, MCC I and MCC II) were estimated by iBAQ and LFQ methods, in order to evaluate their quantity and abundance. The iBAQ intensities were normalized by dividing each value by that of the major primary scaffoldin ScaA1 in each sample, in order to facilitate interpretation of the results and relate the celulosomal proteins to the major primary scaffoldin within the samples. The LFQ intensities were normalized by dividing the values by the intensity of ScaA1 in CB I, in order to simplify the fold-change analysis between the different samples. **A.** Identified scaffoldins in each fraction. **B.** 166 identified dockerin-containing proteins. CB, cellobiose; MCC, microcrystalline cellulose; Doc, dockerin; GH, glycoside hydrolase; CBM, carbohydrate-binding module; CE, carbohydrate esterase; PL, polysaccharide lyases. Significant iBAQ values ( $\geq 0.10$ ) are shown in bold. The range of LFQ values is color coded according to the scale shown at the bottom.

**A.**

| Gene name  | Scaffoldin name | iBAQ Values |             |             |             | LFQ Values |           |           |            |
|------------|-----------------|-------------|-------------|-------------|-------------|------------|-----------|-----------|------------|
|            |                 | iBAQ CB I   | iBAQ CB II  | iBAQ MCC I  | iBAQ MCC II | LFQ CB I   | LFQ CB II | LFQ MCC I | LFQ MCC II |
| Bccel_2050 | <b>ScaA1</b>    | <b>1.00</b> | <b>1.00</b> | <b>1.00</b> | <b>1.00</b> | 1.000      | 0.160     | 1.303     | 0.302      |
| Bccel_1393 | <b>ScaA2</b>    | 0.09        | 0.02        | <b>0.33</b> | <b>0.16</b> | 0.084      | 0.006     | 0.516     | 0.071      |
| Bccel_2049 | <b>ScaB</b>     | 0.03        | 0.02        | 0.02        | 0.01        | 0.033      | 0.009     | 0.028     | 0.010      |
| Bccel_3672 | <b>ScaE</b>     | <b>1.89</b> | <b>3.71</b> | <b>1.34</b> | <b>2.22</b> | 1.262      | 0.399     | 1.261     | 0.490      |
| Bccel_0335 | <b>ScaF1</b>    | <b>0.56</b> | <b>0.12</b> | <b>0.18</b> | <b>0.16</b> | 0.139      | 0.006     | 0.060     | 0.012      |
| Bccel_1026 | <b>ScaF2</b>    | 0.04        | 0.04        | 0.01        | 0.02        | 0.010      | 0.004     | 0.002     | 0.003      |
| Bccel_1881 | <b>ScaG</b>     | 0.02        | <b>2.79</b> | 0.01        | <b>1.67</b> | 0.008      | 0.114     | 0.004     | 0.154      |
| Bccel_5400 | <b>ScaH2</b>    | <b>0.12</b> | <b>1.87</b> | <b>0.29</b> | <b>1.62</b> | 0.016      | 0.047     | 0.036     | 0.096      |
| Bccel_3452 | <b>ScaH3</b>    | 0.03        | 0.03        | 0.01        | 0.02        | 0.006      | 0.003     | 0.004     | 0.002      |
| Bccel_1798 | <b>ScaI</b>     | 0.00        | 0.01        | 0.01        | 0.03        | 0.001      | 0.001     | 0.004     | 0.003      |
| Bccel_1025 | <b>ScaJ</b>     | 0.01        | 0.04        | 0.00        | 0.02        | 0.003      | 0.002     | 0.001     | 0.003      |
| Bccel_2276 | <b>ScaL1</b>    | 0.04        | <b>0.27</b> | 0.02        | <b>0.20</b> | 0.005      | 0.013     | 0.004     | 0.015      |
| Bccel_2277 | <b>ScaL2</b>    | <b>0.22</b> | <b>0.16</b> | <b>0.36</b> | <b>0.44</b> | 0.049      | 0.007     | 0.094     | 0.038      |
| Bccel_4693 | <b>ScaM1</b>    | 0.03        | 0.03        | 0.02        | 0.02        | 0.012      | 0.006     | 0.011     | 0.005      |
| Bccel_3957 | <b>ScaM2</b>    | 0.00        | 0.01        | 0.00        | 0.01        | 0.000      | 0.001     | 0.000     | 0.002      |
| Bccel_3191 | <b>ScaO</b>     | 0.00        | 0.00        | 0.00        | 0.00        | 0.001      | 0.000     | 0.001     | 0.001      |
| Bccel_5402 | <b>ScaO2</b>    | 0.00        | 0.03        | 0.00        | 0.08        | 0.001      | 0.005     | 0.002     | 0.015      |
| Bccel_5008 | <b>ScaP</b>     | 0.00        | 0.00        | 0.00        | 0.00        | 0.001      | 0.000     | 0.000     | 0.000      |
| Bccel_1808 | <b>ScaS</b>     | 0.06        | 0.02        | 0.02        | 0.01        | 0.020      | 0.000     | 0.007     | 0.000      |
| Bccel_5396 | <b>ScaT</b>     | 0.01        | 0.05        | 0.00        | 0.01        | 0.001      | 0.002     | 0.001     | 0.001      |
| Bccel_0665 | <b>ScaU</b>     | 0.05        | 0.09        | 0.01        | 0.05        | 0.020      | 0.010     | 0.008     | 0.011      |
| Bccel_1669 | <b>ScaV</b>     | 0.00        | 0.02        | 0.00        | 0.01        | 0.000      | 0.000     | 0.000     | 0.000      |
| Bccel_1027 | <b>ScaW1</b>    | 0.01        | 0.06        | 0.00        | 0.01        | 0.001      | 0.001     | 0.001     | 0.001      |
| Bccel_2278 | <b>ScaW2</b>    | 0.00        | 0.05        | 0.00        | 0.02        | 0.000      | 0.001     | 0.000     | 0.001      |
|            |                 |             |             |             | 0           | 0.001      | 0.01      | 0.1       | 1          |

**B.**

| Gene name  | Protein composition                          | iBAQ,CB I | iBAQ,CB II | iBAQ,MCC I | iBAQ,MCC II | LFQ,CB I | LFQ,CB II | LFQ,MCC I | LFQ,MCC II |
|------------|----------------------------------------------|-----------|------------|------------|-------------|----------|-----------|-----------|------------|
| Bccel_2753 | GH48-Doc                                     | 3.220     | 7.503      | 2.983      | 5.976       | 1.310    | 0.467     | 2.188     | 0.824      |
| Bccel_3834 | CBM4-X229-GH9-Doc                            | 1.795     | 3.785      | 1.762      | 3.899       | 0.620    | 0.259     | 1.066     | 0.521      |
| Bccel_4718 | CBM30-X229-GH9-Doc                           | 0.656     | 0.385      | 0.570      | 0.445       | 0.418    | 0.047     | 0.571     | 0.105      |
| Bccel_2557 | CBM4-X229-GH9-Doc                            | 0.665     | 0.512      | 0.727      | 0.665       | 0.275    | 0.052     | 0.489     | 0.114      |
| Bccel_1485 | GH9-CBM3_1-X60-Doc                           | 0.383     | 0.374      | 0.407      | 0.395       | 0.229    | 0.045     | 0.393     | 0.089      |
| Bccel_0485 | GH9-CBM3-CBM3-X60-Doc                        | 0.237     | 1.114      | 0.118      | 0.831       | 0.158    | 0.147     | 0.139     | 0.219      |
| Bccel_0913 | X60-Doc                                      | 0.182     | 0.123      | 0.167      | 0.166       | 0.146    | 0.025     | 0.209     | 0.059      |
| Bccel_1896 | GH9-Doc                                      | 0.315     | 0.147      | 0.398      | 0.285       | 0.117    | 0.012     | 0.262     | 0.046      |
| Bccel_4177 | GH30-X92-X60-Doc                             | 0.347     | 0.158      | 0.312      | 0.194       | 0.107    | 0.015     | 0.161     | 0.032      |
| Bccel_5635 | GH74-X60-Doc                                 | 0.190     | 0.127      | 0.186      | 0.131       | 0.103    | 0.018     | 0.172     | 0.033      |
| Bccel_0992 | GH9-CBM3_1-X60-Doc                           | 0.223     | 0.209      | 0.361      | 0.338       | 0.093    | 0.023     | 0.280     | 0.063      |
| Bccel_1632 | GH11-CBM6-Doc-GH10                           | 0.221     | 0.097      | 0.194      | 0.133       | 0.078    | 0.008     | 0.139     | 0.020      |
| Bccel_3943 | GH5_1-X60-Doc                                | 0.245     | 0.242      | 0.229      | 0.211       | 0.078    | 0.026     | 0.107     | 0.041      |
| Bccel_1330 | GH9-CBM3_1-X60-Doc                           | 0.161     | 0.075      | 0.161      | 0.152       | 0.073    | 0.010     | 0.123     | 0.033      |
| Bccel_3527 | GH8-Doc                                      | 0.357     | 1.372      | 0.312      | 1.076       | 0.073    | 0.059     | 0.109     | 0.086      |
| Bccel_2462 | X60-Doc-CE2                                  | 0.211     | 0.229      | 0.179      | 0.229       | 0.071    | 0.016     | 0.092     | 0.026      |
| Bccel_0290 | GH9-CBM3_1-X60-Doc                           | 0.119     | 0.120      | 0.158      | 0.169       | 0.070    | 0.019     | 0.132     | 0.038      |
| Bccel_3813 | GH9-CBM3-X60-Doc                             | 0.153     | 1.123      | 0.179      | 1.025       | 0.068    | 0.093     | 0.135     | 0.140      |
| Bccel_0820 | GH9-CBM3_1-X60-Doc                           | 0.151     | 0.296      | 0.163      | 0.164       | 0.067    | 0.035     | 0.118     | 0.036      |
| Bccel_2823 | GH9-X60-Doc                                  | 0.187     | 0.355      | 0.206      | 0.443       | 0.066    | 0.026     | 0.123     | 0.070      |
| Bccel_1199 | X60-Doc-X229-GH9                             | 0.136     | 0.366      | 0.316      | 0.512       | 0.064    | 0.038     | 0.231     | 0.097      |
| Bccel_1495 | GH5_1-X60-Doc                                | 0.147     | 0.880      | 0.152      | 0.475       | 0.060    | 0.071     | 0.114     | 0.074      |
| Bccel_4152 | PL1_5-X60-Doc-PL9_1                          | 0.145     | 0.047      | 0.063      | 0.056       | 0.059    | 0.006     | 0.041     | 0.012      |
| Bccel_1274 | X140-X135-X139-X60-Doc                       | 0.100     | 0.354      | 0.127      | 0.254       | 0.057    | 0.046     | 0.127     | 0.062      |
| Bccel_1486 | CBM22-CE4-CBM22-CBM22-GH10-CBM9-CBM9-X60-Doc | 0.057     | 0.194      | 0.032      | 0.137       | 0.053    | 0.034     | 0.052     | 0.060      |
| Bccel_4932 | X60-Doc                                      | 0.111     | 0.172      | 0.075      | 0.119       | 0.052    | 0.017     | 0.063     | 0.022      |
| Bccel_3814 | GH10-CBM6-Doc                                | 0.179     | 0.149      | 0.237      | 0.169       | 0.050    | 0.012     | 0.091     | 0.020      |
| Bccel_1216 | GH5-CBM32-X60-Doc                            | 0.134     | 0.210      | 0.217      | 0.250       | 0.049    | 0.019     | 0.101     | 0.037      |
| Bccel_1260 | GH11-Doc                                     | 0.227     | 0.175      | 0.221      | 0.193       | 0.046    | 0.007     | 0.078     | 0.015      |
| Bccel_2493 | X140-X135-X139-X60-Doc                       | 0.072     | 0.112      | 0.104      | 0.143       | 0.045    | 0.020     | 0.115     | 0.046      |
| Bccel_5189 | GH9-CBM3_1-Doc                               | 0.089     | 0.517      | 0.031      | 0.248       | 0.045    | 0.041     | 0.028     | 0.043      |
| Bccel_5136 | CBM30-X229-GH9-Doc                           | 0.070     | 0.178      | 0.014      | 0.044       | 0.042    | 0.014     | 0.012     | 0.010      |
| Bccel_0526 | X60-Doc                                      | 0.142     | 0.137      | 0.266      | 0.335       | 0.040    | 0.012     | 0.114     | 0.042      |
| Bccel_5216 | CBM4-X229-GH9-Doc                            | 0.080     | 0.235      | 0.173      | 0.464       | 0.038    | 0.023     | 0.143     | 0.082      |
| Bccel_0895 | GH48-Doc                                     | 0.078     | 0.030      | 0.154      | 0.071       | 0.036    | 0.003     | 0.117     | 0.013      |
| Bccel_5539 | Doc-cd07761                                  | 0.154     | 0.012      | 0.135      | 0.027       | 0.035    | 0.001     | 0.053     | 0.003      |
| Bccel_5620 | CE12-Doc                                     | 0.178     | 0.196      | 0.117      | 0.132       | 0.034    | 0.011     | 0.037     | 0.012      |
| Bccel_5627 | PL11_1-Doc                                   | 0.101     | 0.308      | 0.054      | 0.285       | 0.034    | 0.021     | 0.036     | 0.030      |
| Bccel_2002 | GH9-X60-Doc                                  | 0.095     | 0.054      | 0.067      | 0.049       | 0.033    | 0.006     | 0.042     | 0.009      |
| Bccel_1280 | GH9-CBM3_1-Doc                               | 0.077     | 0.916      | 0.075      | 0.710       | 0.032    | 0.086     | 0.052     | 0.116      |
| Bccel_0690 | GH8-Doc-CE4                                  | 0.089     | 0.025      | 0.088      | 0.047       | 0.032    | 0.002     | 0.051     | 0.009      |
| Bccel_0866 | X134-X64-X60-Doc                             | 0.062     | 0.025      | 0.053      | 0.034       | 0.031    | 0.004     | 0.053     | 0.009      |
| Bccel_4940 | X60-Doc                                      | 0.103     | 0.004      | 0.074      | 0.004       | 0.030    | 0.001     | 0.034     | 0.001      |
| Bccel_3616 | CBM4-X229-GH9-Doc                            | 0.054     | 0.089      | 0.053      | 0.150       | 0.029    | 0.011     | 0.041     | 0.025      |
| Bccel_3230 | X60-Doc-X188                                 | 0.128     | 0.132      | 0.082      | 0.144       | 0.027    | 0.005     | 0.029     | 0.012      |
| Bccel_4429 | pfam05547-X60-Doc                            | 0.077     | 0.078      | 0.040      | 0.057       | 0.025    | 0.007     | 0.024     | 0.009      |
| Bccel_3733 | GH11-GH10-Doc-CE4                            | 0.067     | 0.071      | 0.151      | 0.146       | 0.024    | 0.009     | 0.113     | 0.034      |
| Bccel_0521 | GH9-CBM3-CBM3-X60-Doc                        | 0.038     | 0.104      | 0.038      | 0.083       | 0.023    | 0.014     | 0.039     | 0.021      |
| Bccel_0991 | GH5_1-X60-Doc                                | 0.075     | 0.052      | 0.202      | 0.178       | 0.021    | 0.005     | 0.103     | 0.025      |
| Bccel_2733 | CBM4-X229-GH9-Doc                            | 0.035     | 0.072      | 0.125      | 0.254       | 0.021    | 0.010     | 0.114     | 0.053      |
| Bccel_0917 | CBM35-GH26-Doc                               | 0.093     | 0.056      | 0.081      | 0.065       | 0.021    | 0.003     | 0.031     | 0.007      |
| Bccel_1286 | Doc-CE6                                      | 0.106     | 0.063      | 0.109      | 0.079       | 0.021    | 0.003     | 0.039     | 0.009      |
| Bccel_3614 | CBM4-X229-GH9-Doc                            | 0.045     | 0.069      | 0.057      | 0.077       | 0.020    | 0.010     | 0.042     | 0.018      |
| Bccel_1743 | GH30_8-X92-Doc                               | 0.086     | 0.078      | 0.056      | 0.060       | 0.019    | 0.005     | 0.026     | 0.007      |
| Bccel_0386 | GH5_1-Doc                                    | 0.075     | 0.056      | 0.124      | 0.117       | 0.019    | 0.005     | 0.055     | 0.015      |
| Bccel_2822 | Doc-GH43                                     | 0.051     | 0.202      | 0.032      | 0.179       | 0.019    | 0.016     | 0.021     | 0.023      |
| Bccel_1738 | GH43-CBM13-Doc-GH16                          | 0.032     | 0.163      | 0.046      | 0.091       | 0.018    | 0.019     | 0.041     | 0.021      |
| Bccel_0535 | Doc-X135-X139                                | 0.058     | 0.023      | 0.067      | 0.048       | 0.018    | 0.002     | 0.029     | 0.006      |
| Bccel_0519 | GH9-CBM3_1-X60-Doc                           | 0.044     | 0.141      | 0.032      | 0.094       | 0.017    | 0.011     | 0.023     | 0.015      |
| Bccel_5541 | GH30_5-Doc                                   | 0.076     | 0.021      | 0.062      | 0.029       | 0.017    | 0.002     | 0.025     | 0.004      |
| Bccel_0882 | GH9-CBM3_1-X60-Doc                           | 0.051     | 0.089      | 0.114      | 0.075       | 0.016    | 0.006     | 0.053     | 0.010      |
| Bccel_0881 | GH9-CBM3_1-X60-Doc                           | 0.059     | 0.110      | 0.105      | 0.148       | 0.016    | 0.006     | 0.042     | 0.014      |
| Bccel_2454 | GH18-X60-Doc                                 | 0.038     | 0.112      | 0.048      | 0.125       | 0.015    | 0.011     | 0.027     | 0.019      |
| Bccel_5699 | X60-Doc                                      | 0.031     | 0.025      | 0.030      | 0.058       | 0.014    | 0.003     | 0.024     | 0.010      |
| Bccel_1250 | CBM35-GH26-X60-Doc                           | 0.030     | 0.129      | 0.135      | 0.596       | 0.014    | 0.014     | 0.072     | 0.072      |
| Bccel_4897 | Doc                                          | 0.028     | 0.048      | 0.065      | 0.059       | 0.014    | 0.008     | 0.054     | 0.014      |
| Bccel_2492 | GH5_8-GH5_8-Doc                              | 0.021     | 0.018      | 0.282      | 0.338       | 0.013    | 0.004     | 0.276     | 0.074      |
| Bccel_5617 | GH43-X60-Doc                                 | 0.068     | 0.086      | 0.050      | 0.043       | 0.012    | 0.005     | 0.019     | 0.005      |
| Bccel_4009 | GH3-X60-Doc                                  | 0.024     | 0.034      | 0.106      | 0.117       | 0.012    | 0.004     | 0.085     | 0.029      |
| Bccel_3613 | CBM4-X229-GH9-Doc                            | 0.027     | 0.061      | 0.022      | 0.074       | 0.011    | 0.006     | 0.013     | 0.013      |
| Bccel_0496 | X60-Doc                                      | 0.183     | 0.143      | 0.104      | 0.042       | 0.011    | 0.002     | 0.010     | 0.002      |
| Bccel_5171 | X60-Doc-COG5184                              | 0.014     | 0.117      | 0.062      | 0.064       | 0.010    | 0.007     | 0.071     | 0.024      |
| Bccel_3615 | CBM4-X229-GH9-Doc                            | 0.018     | 0.013      | 0.016      | 0.029       | 0.010    | 0.002     | 0.011     | 0.006      |
| Bccel_5621 | X70-CE12-Doc                                 | 0.024     | 0.263      | 0.025      | 0.187       | 0.009    | 0.017     | 0.017     | 0.022      |
| Bccel_1951 | CBM3_1-X60-Doc                               | 0.056     | 0.068      | 0.038      | 0.040       | 0.009    | 0.003     | 0.011     | 0.003      |
| Bccel_4055 | X60-Doc                                      | 0.022     | 0.056      | 0.057      | 0.097       | 0.009    | 0.005     | 0.034     | 0.016      |
| Bccel_0520 | GH9-CBM3-CBM3-X60-Doc                        | 0.012     | 0.157      | 0.012      | 0.158       | 0.009    | 0.026     | 0.013     | 0.044      |
| Bccel_5397 | Doc-(X159)14                                 | 0.016     | 0.048      | 0.003      | 0.011       | 0.008    | 0.004     | 0.004     | 0.004      |
| Bccel_0571 | X60-Doc                                      | 0.006     | 0.006      | 0.006      | 0.004       | 0.008    | 0.002     | 0.016     | 0.004      |
| Bccel_2724 | X60-Doc                                      | 0.012     | 0.019      | 0.012      | 0.016       | 0.008    | 0.004     | 0.011     | 0.005      |
| Bccel_5509 | Doc                                          | 0.077     | 0.021      | 0.073      | 0.061       | 0.008    | 0.001     | 0.010     | 0.001      |
| Bccel_0923 | Doc-(X159)16                                 | 0.016     | 0.009      | 0.028      | 0.024       | 0.007    | 0.001     | 0.020     | 0.004      |
| Bccel_1192 | X60-Doc-X295                                 | 0.021     | 0.002      | 0.023      | 0.009       | 0.007    | 0.000     | 0.014     | 0.001      |

|            |                                     |              |              |       |              |       |              |       |       |
|------------|-------------------------------------|--------------|--------------|-------|--------------|-------|--------------|-------|-------|
| Bccel_1227 | X139-X60-Doc                        | 0.020        | 0.015        | 0.041 | 0.024        | 0.007 | 0.001        | 0.026 | 0.004 |
| Bccel_2113 | X260-X60-Doc                        | 0.021        | 0.032        | 0.026 | 0.023        | 0.007 | 0.004        | 0.015 | 0.004 |
| Bccel_0437 | X60-Doc                             | 0.019        | <b>0.125</b> | 0.019 | <b>0.133</b> | 0.007 | 0.009        | 0.010 | 0.014 |
| Bccel_5700 | X60-Doc                             | 0.019        | 0.073        | 0.007 | 0.075        | 0.006 | 0.006        | 0.006 | 0.011 |
| Bccel_3972 | Doc                                 | 0.002        | 0.062        | 0.005 | 0.002        | 0.006 | 0.004        | 0.009 | 0.004 |
| Bccel_1242 | X140-X135-X139-X60-Doc              | 0.011        | 0.005        | 0.027 | 0.012        | 0.006 | 0.000        | 0.030 | 0.005 |
| Bccel_5508 | GH5_2-Doc                           | 0.011        | <b>0.147</b> | 0.011 | 0.058        | 0.005 | 0.001        | 0.010 | 0.006 |
| Bccel_4973 | Doc                                 | 0.023        | <b>0.172</b> | 0.020 | <b>0.143</b> | 0.005 | <b>0.008</b> | 0.010 | 0.013 |
| Bccel_1750 | GH44-X60-Doc                        | 0.016        | 0.017        | 0.010 | 0.017        | 0.005 | 0.002        | 0.006 | 0.003 |
| Bccel_5100 | X260-X60-Doc                        | 0.013        | 0.099        | 0.021 | 0.069        | 0.005 | 0.009        | 0.015 | 0.014 |
| Bccel_5587 | CBM4-X229-GH9-Doc                   | 0.011        | 0.006        | 0.016 | 0.011        | 0.005 | 0.001        | 0.014 | 0.002 |
| Bccel_3434 | X60-Doc-EXPN-CBM63                  | 0.023        | 0.013        | 0.028 | 0.015        | 0.005 | 0.001        | 0.011 | 0.002 |
| Bccel_2300 | X60-Doc                             | 0.009        | 0.048        | 0.009 | 0.056        | 0.005 | 0.006        | 0.007 | 0.011 |
| Bccel_2732 | CBM4-X229-GH9-Doc                   | 0.007        | 0.024        | 0.032 | <b>0.170</b> | 0.005 | 0.005        | 0.031 | 0.035 |
| Bccel_3459 | COG5184-X60-Doc                     | 0.007        | 0.058        | 0.004 | 0.031        | 0.004 | 0.006        | 0.004 | 0.006 |
| Bccel_3435 | Doc                                 | 0.022        | 0.013        | 0.020 | 0.017        | 0.004 | 0.001        | 0.009 | 0.003 |
| Bccel_0464 | X3-X139-Doc                         | 0.013        | <b>0.152</b> | 0.016 | <b>0.126</b> | 0.004 | 0.009        | 0.008 | 0.014 |
| Bccel_3109 | CE1-Doc                             | 0.014        | 0.004        | 0.006 | 0.003        | 0.004 | 0.000        | 0.002 | 0.000 |
| Bccel_0527 | Doc-cd01830                         | 0.014        | 0.063        | 0.020 | 0.021        | 0.004 | 0.004        | 0.008 | 0.002 |
| Bccel_4972 | X60-Doc                             | 0.015        | 0.077        | 0.044 | 0.079        | 0.004 | 0.004        | 0.016 | 0.009 |
| Bccel_0816 | X60-Doc                             | 0.015        | 0.048        | 0.068 | 0.055        | 0.004 | 0.004        | 0.023 | 0.006 |
| Bccel_2186 | X60-Doc                             | 0.007        | 0.010        | 0.003 | 0.005        | 0.004 | 0.001        | 0.003 | 0.001 |
| Bccel_2479 | Doc                                 | 0.011        | 0.007        | 0.009 | 0.005        | 0.003 | 0.000        | 0.005 | 0.001 |
| Bccel_5401 | CBM6_dist-CBM6_dist-X60-Doc         | 0.008        | 0.002        | 0.005 | 0.004        | 0.003 | 0.000        | 0.003 | 0.001 |
| Bccel_4963 | X60-Doc                             | 0.009        | 0.050        | 0.023 | 0.093        | 0.003 | 0.004        | 0.013 | 0.010 |
| Bccel_2734 | GH9-Doc                             | 0.028        | <b>0.206</b> | 0.055 | <b>0.522</b> | 0.003 | 0.004        | 0.010 | 0.016 |
| Bccel_3832 | X60-Doc-X130                        | 0.004        | 0.044        | 0.004 | 0.052        | 0.003 | 0.006        | 0.004 | 0.010 |
| Bccel_1672 | X60-Doc                             | 0.009        | 0.052        | 0.008 | 0.026        | 0.003 | 0.003        | 0.003 | 0.004 |
| Bccel_0468 | GH81-Doc                            | 0.011        | 0.007        | 0.010 | 0.015        | 0.003 | 0.002        | 0.005 | 0.008 |
| Bccel_0847 | X60-Doc-CE6                         | 0.009        | <b>0.354</b> | 0.023 | <b>0.182</b> | 0.002 | 0.015        | 0.011 | 0.017 |
| Bccel_1770 | GH43-CBM13-X60-Doc                  | 0.004        | 0.050        | 0.002 | 0.040        | 0.002 | 0.005        | 0.002 | 0.008 |
| Bccel_0522 | GH9-CBM3_1-X60-Doc                  | 0.005        | 0.003        | 0.005 | 0.003        | 0.002 | 0.000        | 0.004 | 0.001 |
| Bccel_0394 | CBM6-X60-Doc                        | 0.008        | 0.002        | 0.003 | 0.004        | 0.002 | 0.000        | 0.001 | 0.001 |
| Bccel_5625 | X3-X139-Doc                         | 0.004        | 0.009        | 0.009 | 0.020        | 0.002 | 0.001        | 0.005 | 0.002 |
| Bccel_2471 | Doc                                 | 0.015        | 0.023        | 0.015 | 0.034        | 0.002 | 0.001        | 0.003 | 0.003 |
| Bccel_3562 | X60-Doc                             | 0.003        | 0.007        | 0.038 | 0.048        | 0.002 | 0.001        | 0.034 | 0.011 |
| Bccel_0922 | X139-CBM4-Doc                       | 0.003        | 0.041        | 0.004 | <b>0.121</b> | 0.002 | 0.003        | 0.003 | 0.012 |
| Bccel_0465 | GH8-Doc-CE3                         | 0.008        | 0.000        | 0.008 | 0.005        | 0.002 | 0.000        | 0.004 | 0.001 |
| Bccel_1917 | Doc                                 | 0.008        | 0.011        | 0.008 | 0.007        | 0.002 | 0.001        | 0.003 | 0.001 |
| Bccel_5268 | X60-Doc-X259                        | 0.009        | 0.022        | 0.001 | 0.005        | 0.002 | 0.001        | 0.001 | 0.000 |
| Bccel_5217 | Doc                                 | 0.014        | 0.021        | 0.016 | 0.016        | 0.002 | 0.001        | 0.003 | 0.002 |
| Bccel_5387 | Doc-Doc                             | 0.002        | 0.064        | 0.016 | <b>0.222</b> | 0.002 | 0.006        | 0.009 | 0.031 |
| Bccel_5153 | GH26-Doc                            | 0.011        | 0.025        | 0.007 | 0.024        | 0.001 | 0.001        | 0.002 | 0.002 |
| Bccel_0839 | Doc-Doc                             | <b>0.080</b> | <b>0.186</b> | 0.075 | <b>1.135</b> | 0.001 | 0.001        | 0.004 | 0.015 |
| Bccel_5724 | X60-Doc                             | 0.002        | 0.006        | 0.004 | 0.009        | 0.001 | 0.000        | 0.004 | 0.003 |
| Bccel_5372 | COG5184-X60-Doc                     | 0.003        | 0.021        | 0.001 | 0.009        | 0.001 | 0.002        | 0.001 | 0.002 |
| Bccel_1262 | CE3-Doc                             | 0.008        | 0.003        | 0.003 | 0.003        | 0.001 | 0.000        | 0.001 | 0.000 |
| Bccel_1915 | CBM9-Doc                            | 0.004        | 0.015        | 0.003 | 0.016        | 0.001 | 0.002        | 0.002 | 0.004 |
| Bccel_1660 | pfam00149-X60-Doc                   | 0.005        | 0.009        | 0.005 | 0.009        | 0.001 | 0.001        | 0.003 | 0.002 |
| Bccel_2491 | GH5_8-Doc                           | 0.003        | 0.005        | 0.070 | 0.083        | 0.001 | 0.000        | 0.033 | 0.008 |
| Bccel_4836 | X60-Doc                             | 0.004        | 0.047        | 0.002 | 0.015        | 0.001 | 0.004        | 0.001 | 0.002 |
| Bccel_4135 | X60-Doc-X72-X72-X72-X72-FN3-FN3-X83 | 0.001        | 0.000        | 0.001 | 0.000        | 0.001 | 0.000        | 0.004 | 0.000 |
| Bccel_4923 | X60-Doc                             | 0.005        | 0.065        | 0.001 | 0.036        | 0.001 | 0.003        | 0.000 | 0.004 |
| Bccel_3097 | GH43-CBM6-Doc                       | 0.003        | 0.001        | 0.005 | 0.002        | 0.001 | 0.000        | 0.003 | 0.000 |
| Bccel_4686 | X60-Doc                             | 0.006        | 0.010        | 0.006 | 0.019        | 0.001 | 0.001        | 0.002 | 0.002 |
| Bccel_3076 | GH11-CBM6-Doc-GH10                  | 0.002        | 0.001        | 0.003 | 0.000        | 0.001 | 0.000        | 0.003 | 0.000 |
| Bccel_1798 | X60-Doc                             | 0.003        | 0.011        | 0.009 | 0.023        | 0.001 | 0.001        | 0.004 | 0.003 |
| Bccel_5725 | CE1-Doc                             | 0.004        | 0.001        | 0.003 | 0.003        | 0.001 | 0.000        | 0.001 | 0.000 |
| Bccel_3093 | GH11-GH10-Doc-X124                  | 0.001        | 0.000        | 0.002 | 0.000        | 0.001 | 0.000        | 0.001 | 0.000 |
| Bccel_1439 | cd02619-X135-Doc                    | 0.001        | 0.005        | 0.000 | 0.001        | 0.001 | 0.001        | 0.000 | 0.000 |
| Bccel_1253 | COG5184-X60-Doc                     | 0.001        | 0.009        | 0.000 | 0.005        | 0.001 | 0.001        | 0.001 | 0.001 |
| Bccel_5179 | CE8-CBM35-Doc                       | 0.003        | <b>0.121</b> | 0.015 | <b>0.119</b> | 0.001 | 0.007        | 0.009 | 0.013 |
| Bccel_0518 | GH43-Doc                            | 0.005        | 0.013        | 0.002 | 0.008        | 0.001 | 0.001        | 0.000 | 0.001 |
| Bccel_3151 | X60-Doc-PLnc                        | 0.001        | 0.007        | 0.003 | 0.013        | 0.001 | 0.001        | 0.002 | 0.002 |
| Bccel_4452 | Doc-(X159)10                        | 0.001        | 0.006        | 0.003 | 0.014        | 0.001 | 0.000        | 0.001 | 0.002 |
| Bccel_3095 | GH62-CBM6-Doc-GH10                  | 0.001        | 0.000        | 0.002 | 0.001        | 0.001 | 0.000        | 0.002 | 0.000 |
| Bccel_0545 | X60-Doc                             | 0.004        | 0.018        | 0.001 | 0.008        | 0.000 | 0.001        | 0.001 | 0.001 |
| Bccel_4945 | Doc-CBM4-GH16                       | 0.001        | 0.001        | 0.001 | 0.002        | 0.000 | 0.000        | 0.000 | 0.000 |
| Bccel_1277 | X3-Doc                              | 0.000        | 0.003        | 0.000 | 0.015        | 0.000 | 0.000        | 0.000 | 0.003 |
| Bccel_4653 | Doc                                 | 0.002        | 0.000        | 0.001 | 0.000        | 0.000 | 0.000        | 0.000 | 0.000 |
| Bccel_3617 | GH9-Doc                             | 0.001        | 0.000        | 0.002 | 0.003        | 0.000 | 0.000        | 0.001 | 0.000 |
| Bccel_5626 | X3-X139-Doc                         | 0.001        | 0.029        | 0.002 | 0.051        | 0.000 | 0.002        | 0.001 | 0.007 |
| Bccel_4540 | X139-Doc                            | 0.001        | 0.001        | 0.000 | 0.000        | 0.000 | 0.000        | 0.000 | 0.000 |
| Bccel_3077 | CE1-Doc                             | 0.002        | 0.000        | 0.002 | 0.001        | 0.000 | 0.000        | 0.000 | 0.000 |
| Bccel_1771 | GH48-Doc                            | 0.001        | 0.000        | 0.001 | 0.001        | 0.000 | 0.000        | 0.000 | 0.000 |
| Bccel_1455 | X60-Doc                             | 0.001        | 0.001        | 0.000 | 0.005        | 0.000 | 0.000        | 0.000 | 0.000 |
| Bccel_5269 | X140-X60-Doc-X259                   | 0.000        | 0.012        | 0.001 | 0.005        | 0.000 | 0.000        | 0.001 | 0.000 |
| Bccel_2581 | pfam09394-Doc                       | 0.000        | 0.000        | 0.002 | 0.003        | 0.000 | 0.000        | 0.001 | 0.001 |
| Bccel_4869 | COG5184-COG5184-X60-Doc             | 0.000        | 0.006        | 0.001 | 0.030        | 0.000 | 0.001        | 0.002 | 0.004 |
| Bccel_0689 | CE15-CBM6-Doc                       | 0.000        | 0.000        | 0.000 | 0.000        | 0.000 | 0.000        | 0.000 | 0.000 |
| Bccel_0446 | GH8-Doc-CE4                         | 0.000        | 0.000        | 0.001 | 0.000        | 0.000 | 0.000        | 0.000 | 0.000 |
| Bccel_5276 | COG5184-X60-Doc                     | 0.000        | 0.000        | 0.001 | 0.000        | 0.000 | 0.000        | 0.001 | 0.000 |
| Bccel_4962 | X60-Doc                             | 0.000        | 0.003        | 0.000 | 0.003        | 0.000 | 0.000        | 0.000 | 0.000 |
|            |                                     |              |              |       | 0            | 0.001 | 0.01         | 0.1   | 1     |
