# Supplementary material for: Unraveling essential cellulosomal components of the (Pseudo)Bacteroides cellulosolvens reveals an extensive reservoir of novel catalytic enzymes
Source: PubMed Central journal article supplement (PMC6507058; doi:10.1186/s13068-019-1447-2), 2019-05-09
Supplement: 13068_2019_1447_MOESM6_ESM.pdf [file 13068_2019_1447_MOESM6_ESM.pdf]

Additional file 6

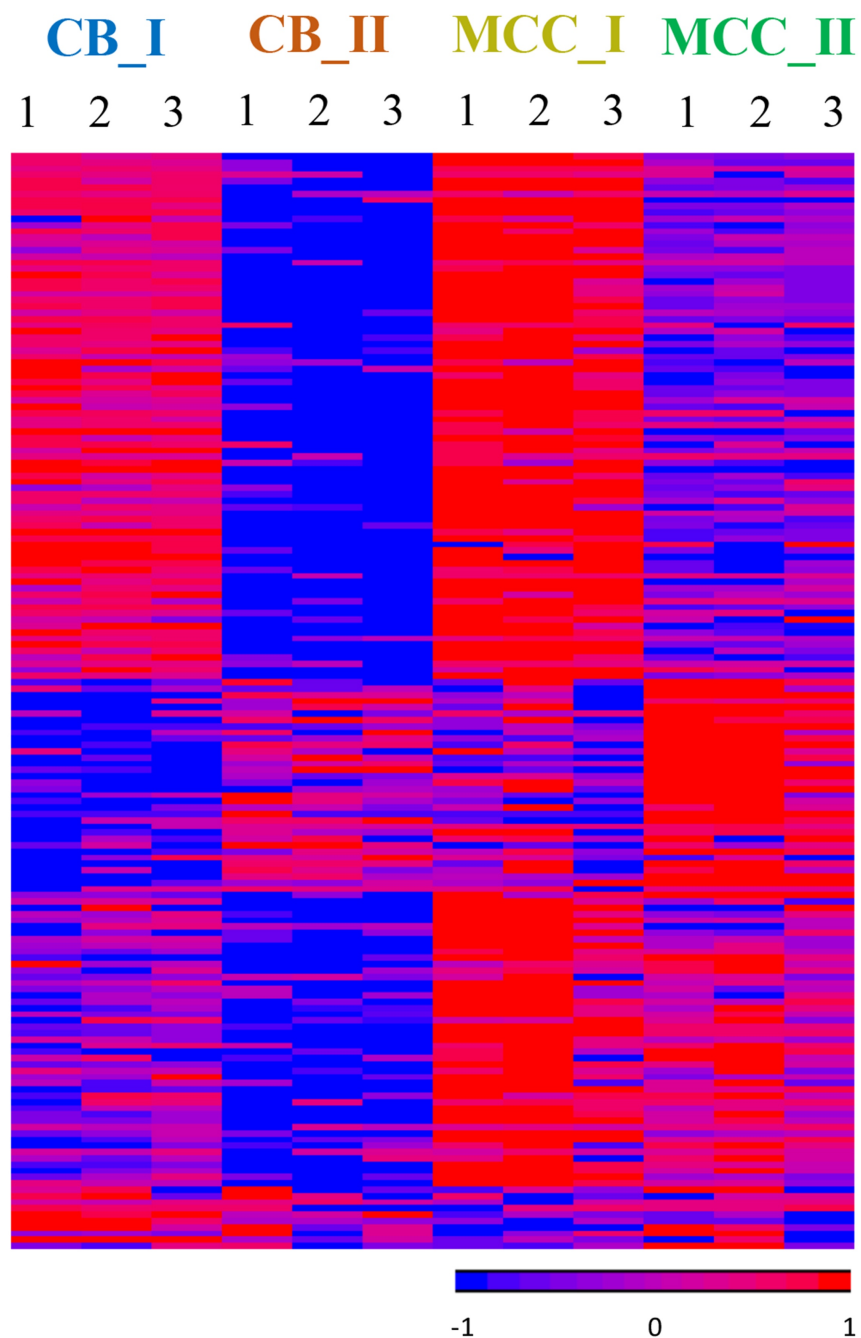

**Figure S3: All dockerin-containing proteins detected in *B. cellulosovens* cells grown on different carbon sources and molecular size fractions.**

Heatmap of LFQ intensity (log<sub>2</sub>) of 166 dockerin-containing proteins (see Additional file 4: Table S3B). Zero intensity values were imputed to 10. Rows were standardized, and clustered by partitional clustering using the Euclidian method. Numbers from 1 to 3 at top represent different triplicates from the two substrates: CB, cellobiose, and MCC, microcrystalline cellulose.
