# Supplementary material for: Unraveling essential cellulosomal components of the (Pseudo)Bacteroides cellulosolvens reveals an extensive reservoir of novel catalytic enzymes
Source: PubMed Central journal article supplement (PMC6507058; doi:10.1186/s13068-019-1447-2), 2019-05-09
Supplement: 13068_2019_1447_MOESM7_ESM.pdf [file 13068_2019_1447_MOESM7_ESM.pdf]

## Additional file 7

**Table S4. Mass spectrometry analysis of normalized GH-containing proteins.**

The intensities of all the proteins in four cellulosomal fractions (CB I, CB II, MCC I and MCC II) were estimated by iBAQ and LFQ methods, in order to evaluate their quantity and abundance. The iBAQ intensities were normalized by dividing each value by that of the major primary scaffoldin ScaA1 in each sample, in order to facilitate interpretation of the results and relate the cellulosomal proteins to the major primary scaffoldin within the samples. The LFQ intensities were normalized by dividing the values by the ScaA1 intensity of CB I in order to simplify the fold-change analysis between the different samples. The table shows 102 identified GH-containing proteins. CB, cellobiose; MCC, microcrystalline cellulose; Doc, dockerin; GH, glycoside hydrolase; CBM, carbohydrate-binding module; CE, carbohydrate esterase; PL, polysaccharide lyases; SLH, S-layer homology module. Significant iBAQ values ( $\geq 0.10$ ) are shown in bold.

| Gene name  | Protein composition   | iBAQ CB I    | iBAQ CB II   | iBAQ MCC I   | iBAQ MCC II  | LFQ CB I     | LFQ CB II | LFQ MCC I    | LFQ MCC II   |
|------------|-----------------------|--------------|--------------|--------------|--------------|--------------|-----------|--------------|--------------|
| Bccel_0290 | GH9-CBM3_1-X60-Doc    | <b>0.119</b> | <b>0.120</b> | <b>0.158</b> | <b>0.169</b> | 0.070        | 0.019     | 0.132        | 0.038        |
| Bccel_0386 | GH5_1-Doc             | 0.075        | 0.056        | <b>0.124</b> | <b>0.117</b> | <b>0.019</b> | 0.005     | <b>0.055</b> | <b>0.015</b> |
| Bccel_0446 | GH8-Doc-CE4           | 0.000        | 0.000        | 0.001        | 0.000        | 0.000        | 0.000     | 0.000        | 0.000        |
| Bccel_0465 | GH8-Doc-CE3           | 0.008        | 0.000        | 0.008        | 0.005        | 0.002        | 0.000     | 0.004        | 0.001        |
| Bccel_0468 | GH81-Doc              | 0.011        | 0.007        | 0.010        | 0.015        | 0.003        | 0.002     | 0.005        | 0.008        |
| Bccel_0485 | GH9-CBM3-CBM3-X60-Doc | <b>0.237</b> | <b>1.114</b> | <b>0.118</b> | <b>0.831</b> | 0.158        | 0.147     | 0.139        | 0.219        |
| Bccel_0497 | GH53                  | <b>0.142</b> | <b>0.136</b> | 0.088        | <b>0.120</b> | <b>0.035</b> | 0.007     | 0.040        | <b>0.014</b> |
| Bccel_0518 | GH43-Doc              | 0.005        | 0.013        | 0.002        | 0.008        | 0.001        | 0.001     | 0.000        | 0.001        |
| Bccel_0519 | GH9-CBM3_1-X60-Doc    | 0.044        | <b>0.141</b> | 0.032        | 0.094        | 0.017        | 0.011     | 0.023        | 0.015        |
| Bccel_0520 | GH9-CBM3-CBM3-X60-Doc | 0.012        | <b>0.157</b> | 0.012        | <b>0.158</b> | 0.009        | 0.026     | 0.013        | 0.044        |
| Bccel_0521 | GH9-CBM3-CBM3-X60-Doc | 0.038        | <b>0.104</b> | 0.038        | 0.083        | <b>0.023</b> | 0.014     | 0.039        | <b>0.021</b> |
| Bccel_0522 | GH9-CBM3_1-X60-Doc    | 0.005        | 0.003        | 0.005        | 0.003        | 0.002        | 0.000     | 0.004        | 0.001        |
| Bccel_0690 | GH8-Doc-CE4           | 0.089        | 0.025        | 0.088        | 0.047        | <b>0.032</b> | 0.002     | <b>0.051</b> | <b>0.009</b> |
| Bccel_0723 | GH5_4                 | 0.001        | 0.005        | 0.000        | 0.019        | 0.001        | 0.001     | 0.001        | 0.001        |
| Bccel_0820 | GH9-CBM3_1-X60-Doc    | <b>0.151</b> | <b>0.296</b> | <b>0.163</b> | <b>0.164</b> | 0.067        | 0.035     | 0.118        | 0.036        |
| Bccel_0881 | GH9-CBM3_1-X60-Doc    | 0.059        | <b>0.110</b> | <b>0.105</b> | <b>0.148</b> | 0.016        | 0.006     | 0.042        | 0.014        |
| Bccel_0882 | GH9-CBM3_1-X60-Doc    | 0.051        | 0.089        | <b>0.114</b> | 0.075        | 0.016        | 0.006     | 0.053        | 0.010        |
| Bccel_0895 | GH48-Doc              | 0.078        | 0.030        | <b>0.154</b> | 0.071        | 0.036        | 0.003     | 0.117        | 0.013        |
| Bccel_0904 | GH94-X91              | 0.064        | <b>0.421</b> | 0.013        | <b>0.169</b> | 0.038        | 0.045     | 0.018        | 0.042        |
| Bccel_0905 | GH3                   | 0.000        | 0.082        | 0.000        | 0.027        | 0.000        | 0.006     | 0.000        | 0.004        |
| Bccel_0909 | CBM4-X229-GH9         | 0.081        | 0.046        | 0.056        | 0.077        | 0.038        | 0.009     | 0.045        | <b>0.023</b> |
| Bccel_0917 | CBM35-GH26-Doc        | 0.093        | 0.056        | 0.081        | 0.065        | 0.021        | 0.003     | 0.031        | 0.007        |
| Bccel_0991 | GH5_1-X60-Doc         | 0.075        | 0.052        | <b>0.202</b> | <b>0.178</b> | 0.021        | 0.005     | 0.103        | 0.025        |
| Bccel_0992 | GH9-CBM3_1-X60-Doc    | <b>0.223</b> | <b>0.209</b> | <b>0.361</b> | <b>0.338</b> | 0.093        | 0.023     | 0.280        | <b>0.063</b> |
| Bccel_1103 | CBM4-X229-GH9         | 0.001        | 0.000        | 0.001        | 0.001        | 0.000        | 0.000     | 0.000        | 0.000        |
| Bccel_1108 | GH11-CBM6-CBM6-CE4    | 0.004        | 0.005        | 0.001        | 0.002        | 0.001        | 0.000     | 0.000        | 0.000        |
| Bccel_1199 | X60-Doc-X229-GH9      | <b>0.136</b> | <b>0.366</b> | <b>0.316</b> | <b>0.512</b> | 0.064        | 0.038     | 0.231        | 0.097        |
| Bccel_1216 | GH5-CBM32-X60-Doc     | <b>0.134</b> | <b>0.210</b> | <b>0.217</b> | <b>0.250</b> | 0.049        | 0.019     | 0.101        | 0.037        |
| Bccel_1250 | CBM35-GH26-X60-Doc    | 0.030        | <b>0.129</b> | <b>0.135</b> | <b>0.596</b> | 0.014        | 0.014     | 0.072        | 0.072        |
| Bccel_1260 | GH11-Doc              | <b>0.227</b> | <b>0.175</b> | <b>0.221</b> | <b>0.193</b> | 0.046        | 0.007     | 0.078        | 0.015        |
| Bccel_1280 | GH9-CBM3_1-Doc        | 0.077        | <b>0.916</b> | 0.075        | <b>0.710</b> | 0.032        | 0.086     | 0.052        | 0.116        |
| Bccel_1330 | GH9-CBM3_1-X60-Doc    | <b>0.161</b> | 0.075        | <b>0.161</b> | <b>0.152</b> | 0.073        | 0.010     | 0.123        | 0.033        |

|            |                                              |       |       |       |       |       |       |       |       |
|------------|----------------------------------------------|-------|-------|-------|-------|-------|-------|-------|-------|
| Bccel_1373 | GH25                                         | 0.001 | 0.000 | 0.000 | 0.000 | 0.000 | 0.000 | 0.000 | 0.000 |
| Bccel_1425 | GH10                                         | 0.000 | 0.005 | 0.000 | 0.003 | 0.000 | 0.000 | 0.000 | 0.000 |
| Bccel_1485 | GH9-CBM3_1-X60-Doc                           | 0.383 | 0.374 | 0.407 | 0.395 | 0.229 | 0.045 | 0.393 | 0.089 |
| Bccel_1486 | CBM22-CE4-CBM22-CBM22-GH10-CBM9-CBM9-X60-Doc | 0.057 | 0.194 | 0.032 | 0.137 | 0.053 | 0.034 | 0.052 | 0.060 |
| Bccel_1491 | CBM22-CE4-CBM22-GH10-CBM9-CBM9-SLH-SLH-SLH   | 0.210 | 1.342 | 0.068 | 1.009 | 0.187 | 0.232 | 0.106 | 0.318 |
| Bccel_1495 | GH5_1-X60-Doc                                | 0.147 | 0.880 | 0.152 | 0.475 | 0.060 | 0.071 | 0.114 | 0.074 |
| Bccel_1632 | GH11-CBM6-Doc-GH10                           | 0.221 | 0.097 | 0.194 | 0.133 | 0.078 | 0.008 | 0.139 | 0.020 |
| Bccel_1712 | GH43                                         | 0.004 | 0.397 | 0.002 | 0.152 | 0.001 | 0.013 | 0.001 | 0.010 |
| Bccel_1738 | GH43-CBM13-Doc-GH16                          | 0.032 | 0.163 | 0.046 | 0.091 | 0.018 | 0.019 | 0.041 | 0.021 |
| Bccel_1743 | GH30_8-X92-Doc                               | 0.086 | 0.078 | 0.056 | 0.060 | 0.019 | 0.005 | 0.026 | 0.007 |
| Bccel_1750 | GH44-X60-Doc                                 | 0.016 | 0.017 | 0.010 | 0.017 | 0.005 | 0.002 | 0.006 | 0.003 |
| Bccel_1770 | GH43-CBM13-X60-Doc                           | 0.004 | 0.050 | 0.002 | 0.040 | 0.002 | 0.005 | 0.002 | 0.008 |
| Bccel_1771 | GH48-Doc                                     | 0.001 | 0.000 | 0.001 | 0.001 | 0.000 | 0.000 | 0.000 | 0.000 |
| Bccel_1896 | GH9-Doc                                      | 0.315 | 0.147 | 0.398 | 0.285 | 0.117 | 0.012 | 0.262 | 0.046 |
| Bccel_1950 | GH9                                          | 0.052 | 0.053 | 0.033 | 0.030 | 0.015 | 0.005 | 0.018 | 0.005 |
| Bccel_2002 | GH9-X60-Doc                                  | 0.095 | 0.054 | 0.067 | 0.049 | 0.033 | 0.006 | 0.042 | 0.009 |
| Bccel_2005 | GH94-X91                                     | 0.025 | 0.539 | 0.021 | 0.159 | 0.018 | 0.056 | 0.021 | 0.039 |
| Bccel_2133 | GH2                                          | 0.001 | 0.001 | 0.001 | 0.001 | 0.000 | 0.000 | 0.001 | 0.000 |
| Bccel_2454 | GH18-X60-Doc                                 | 0.038 | 0.112 | 0.048 | 0.125 | 0.015 | 0.011 | 0.027 | 0.019 |
| Bccel_2491 | GH5_8-Doc                                    | 0.003 | 0.005 | 0.070 | 0.083 | 0.001 | 0.000 | 0.033 | 0.008 |
| Bccel_2492 | GH5_8-GH5_8-Doc                              | 0.021 | 0.018 | 0.282 | 0.338 | 0.013 | 0.004 | 0.276 | 0.074 |
| Bccel_2557 | CBM4-X229-GH9-Doc                            | 0.665 | 0.512 | 0.727 | 0.665 | 0.275 | 0.052 | 0.489 | 0.114 |
| Bccel_2732 | CBM4-X229-GH9-Doc                            | 0.007 | 0.024 | 0.032 | 0.170 | 0.005 | 0.005 | 0.031 | 0.035 |
| Bccel_2733 | CBM4-X229-GH9-Doc                            | 0.035 | 0.072 | 0.125 | 0.254 | 0.021 | 0.010 | 0.114 | 0.053 |
| Bccel_2734 | GH9-Doc                                      | 0.028 | 0.206 | 0.055 | 0.522 | 0.003 | 0.004 | 0.010 | 0.016 |
| Bccel_2735 | CBM4-X229-GH9                                | 0.025 | 0.197 | 0.063 | 0.588 | 0.011 | 0.019 | 0.040 | 0.106 |
| Bccel_2753 | GH48-Doc                                     | 3.220 | 7.503 | 2.983 | 5.976 | 1.310 | 0.467 | 2.188 | 0.824 |
| Bccel_2822 | Doc-GH43                                     | 0.051 | 0.202 | 0.032 | 0.179 | 0.019 | 0.016 | 0.021 | 0.023 |
| Bccel_2823 | GH9-X60-Doc                                  | 0.187 | 0.355 | 0.206 | 0.443 | 0.066 | 0.026 | 0.123 | 0.070 |
| Bccel_3064 | GH10-GH10-SLH                                | 0.006 | 0.160 | 0.003 | 0.193 | 0.010 | 0.035 | 0.010 | 0.078 |
| Bccel_3076 | GH11-CBM6-Doc-GH10                           | 0.002 | 0.001 | 0.003 | 0.000 | 0.001 | 0.000 | 0.003 | 0.000 |
| Bccel_3093 | GH11-GH10-Doc-X124                           | 0.001 | 0.000 | 0.002 | 0.000 | 0.001 | 0.000 | 0.001 | 0.000 |
| Bccel_3095 | GH62-CBM6-Doc-GH10                           | 0.001 | 0.000 | 0.002 | 0.001 | 0.001 | 0.000 | 0.002 | 0.000 |
| Bccel_3097 | GH43-CBM6-Doc                                | 0.003 | 0.001 | 0.005 | 0.002 | 0.001 | 0.000 | 0.003 | 0.000 |
| Bccel_3298 | GH3                                          | 0.000 | 0.001 | 0.000 | 0.002 | 0.000 | 0.000 | 0.000 | 0.000 |
| Bccel_3299 | GH67                                         | 0.008 | 0.001 | 0.007 | 0.003 | 0.003 | 0.001 | 0.006 | 0.001 |
| Bccel_3527 | GH8-Doc                                      | 0.357 | 1.372 | 0.312 | 1.076 | 0.073 | 0.059 | 0.109 | 0.086 |
| Bccel_3613 | CBM4-X229-GH9-Doc                            | 0.027 | 0.061 | 0.022 | 0.074 | 0.011 | 0.006 | 0.013 | 0.013 |
| Bccel_3614 | CBM4-X229-GH9-Doc                            | 0.045 | 0.069 | 0.057 | 0.077 | 0.020 | 0.010 | 0.042 | 0.018 |
| Bccel_3615 | CBM4-X229-GH9-Doc                            | 0.018 | 0.013 | 0.016 | 0.029 | 0.010 | 0.002 | 0.011 | 0.006 |
| Bccel_3616 | CBM4-X229-GH9-Doc                            | 0.054 | 0.089 | 0.053 | 0.150 | 0.029 | 0.011 | 0.041 | 0.025 |
| Bccel_3617 | GH9-Doc                                      | 0.001 | 0.000 | 0.002 | 0.003 | 0.000 | 0.000 | 0.001 | 0.000 |
| Bccel_3618 | CBM4-X229-GH9                                | 0.013 | 0.027 | 0.018 | 0.028 | 0.004 | 0.002 | 0.007 | 0.004 |
| Bccel_3733 | GH11-GH10-Doc-CE4                            | 0.067 | 0.071 | 0.151 | 0.146 | 0.024 | 0.009 | 0.113 | 0.034 |
| Bccel_3813 | GH9-CBM3-X60-Doc                             | 0.153 | 1.123 | 0.179 | 1.025 | 0.068 | 0.093 | 0.135 | 0.140 |
| Bccel_3814 | GH10-CBM6-Doc                                | 0.179 | 0.149 | 0.237 | 0.169 | 0.050 | 0.012 | 0.091 | 0.020 |
| Bccel_3834 | CBM4-X229-GH9-Doc                            | 1.795 | 3.785 | 1.762 | 3.899 | 0.620 | 0.259 | 1.066 | 0.521 |
| Bccel_3943 | GH5_1-X60-Doc                                | 0.245 | 0.242 | 0.229 | 0.211 | 0.078 | 0.026 | 0.107 | 0.041 |
| Bccel_4009 | GH3-X60-Doc                                  | 0.024 | 0.034 | 0.106 | 0.117 | 0.012 | 0.004 | 0.085 | 0.029 |
| Bccel_4126 | GH3                                          | 0.000 | 0.004 | 0.000 | 0.001 | 0.000 | 0.000 | 0.000 | 0.000 |
| Bccel_4177 | GH30-X92-X60-Doc                             | 0.347 | 0.158 | 0.312 | 0.194 | 0.107 | 0.015 | 0.161 | 0.032 |
| Bccel_4191 | CBM2-GH5_1                                   | 0.000 | 0.000 | 0.000 | 0.000 | 0.000 | 0.000 | 0.000 | 0.000 |
| Bccel_4498 | GH5_37                                       | 0.001 | 0.089 | 0.000 | 0.059 | 0.000 | 0.004 | 0.000 | 0.005 |
| Bccel_4519 | CBM50-GH18-pfam07833                         | 0.028 | 0.232 | 0.008 | 0.086 | 0.013 | 0.021 | 0.008 | 0.018 |
| Bccel_4718 | CBM30-X229-GH9-Doc                           | 0.656 | 0.385 | 0.570 | 0.445 | 0.418 | 0.047 | 0.571 | 0.105 |
| Bccel_4945 | Doc-CBM4-GH16                                | 0.001 | 0.001 | 0.001 | 0.002 | 0.000 | 0.000 | 0.000 | 0.000 |
| Bccel_5136 | CBM30-X229-GH9-Doc                           | 0.070 | 0.178 | 0.014 | 0.044 | 0.042 | 0.014 | 0.012 | 0.010 |
| Bccel_5153 | GH26-Doc                                     | 0.011 | 0.025 | 0.007 | 0.024 | 0.001 | 0.001 | 0.002 | 0.002 |
| Bccel_5189 | GH9-CBM3_1-Doc                               | 0.089 | 0.517 | 0.031 | 0.248 | 0.045 | 0.041 | 0.028 | 0.043 |
| Bccel_5216 | CBM4-X229-GH9-Doc                            | 0.080 | 0.235 | 0.173 | 0.464 | 0.038 | 0.023 | 0.143 | 0.082 |
| Bccel_5320 | GH3                                          | 0.002 | 0.116 | 0.000 | 0.039 | 0.001 | 0.011 | 0.000 | 0.009 |
| Bccel_5508 | GH5_2-Doc                                    | 0.011 | 0.147 | 0.011 | 0.058 | 0.005 | 0.001 | 0.010 | 0.006 |
| Bccel_5538 | GH115                                        | 0.000 | 0.001 | 0.000 | 0.001 | 0.000 | 0.000 | 0.000 | 0.000 |
| Bccel_5541 | GH30_5-Doc                                   | 0.076 | 0.021 | 0.062 | 0.029 | 0.017 | 0.002 | 0.025 | 0.004 |
| Bccel_5587 | CBM4-X229-GH9-Doc                            | 0.011 | 0.006 | 0.016 | 0.011 | 0.005 | 0.001 | 0.014 | 0.002 |
| Bccel_5603 | GH10-CBM9_dist-CBM9_dist                     | 0.001 | 0.003 | 0.000 | 0.000 | 0.000 | 0.000 | 0.000 | 0.000 |
| Bccel_5617 | GH43-X60-Doc                                 | 0.068 | 0.086 | 0.050 | 0.043 | 0.012 | 0.005 | 0.019 | 0.005 |
| Bccel_5635 | GH74-X60-Doc                                 | 0.190 | 0.127 | 0.186 | 0.131 | 0.103 | 0.018 | 0.172 | 0.033 |
| Bccel_2759 | X104-CBM48-GH13_9                            | 0.001 | 0.027 | 0.000 | 0.011 | 0.000 | 0.003 | 0.000 | 0.002 |
| Bccel_4024 | GH18                                         | 0.000 | 0.001 | 0.000 | 0.001 | 0.000 | 0.000 | 0.000 | 0.000 |
|            |                                              |       |       |       | 0     | 0.001 | 0.01  | 0.1   | 1     |
