# Supplementary material for: Unraveling essential cellulosomal components of the (Pseudo)Bacteroides cellulosolvens reveals an extensive reservoir of novel catalytic enzymes
Source: PubMed Central journal article supplement (PMC6507058; doi:10.1186/s13068-019-1447-2), 2019-05-09
Supplement: 13068_2019_1447_MOESM8_ESM.pdf [file 13068_2019_1447_MOESM8_ESM.pdf]

**Additional file 8: Table S5. Selected clusters of genes coding CAZyme proteins.**

The intensities of all the proteins in four cellulosomal fractions (CB I, CB II, MCC I and MCC II) were estimated by iBAQ and LFQ methods in order to evaluate their quantity and abundance. The table shows the expression intensities of clustered proteins represented in Figure 6.

| Gene name  | Protein composition   | iBAQ CB I    | iBAQ CB II   | iBAQ MCC I   | iBAQ MCC II  | LFQ CB I | LFQ CB II | LFQ MCC I | LFQ MCC II |
|------------|-----------------------|--------------|--------------|--------------|--------------|----------|-----------|-----------|------------|
| Bccel_0518 | GH43-Doc              | 0.005        | 0.013        | 0.002        | 0.008        | 0.001    | 0.001     | 0.000     | 0.001      |
| Bccel_0519 | GH9-CBM3_1-X60-Doc    | 0.044        | <b>0.141</b> | 0.032        | 0.094        | 0.017    | 0.011     | 0.023     | 0.015      |
| Bccel_0520 | GH9-CBM3-CBM3-X60-Doc | 0.012        | <b>0.157</b> | 0.012        | <b>0.158</b> | 0.009    | 0.026     | 0.013     | 0.044      |
| Bccel_0521 | GH9-CBM3-CBM3-X60-Doc | 0.038        | <b>0.104</b> | 0.038        | 0.083        | 0.023    | 0.014     | 0.039     | 0.021      |
| Bccel_0522 | GH9-CBM3_1-X60-Doc    | 0.005        | 0.003        | 0.005        | 0.003        | 0.002    | 0.000     | 0.004     | 0.001      |
| Bccel_0526 | X60-Doc               | <b>0.142</b> | <b>0.137</b> | <b>0.266</b> | <b>0.335</b> | 0.040    | 0.012     | 0.114     | 0.042      |
| Bccel_0527 | Doc-cd01830           | 0.014        | 0.063        | 0.020        | 0.021        | 0.004    | 0.004     | 0.008     | 0.002      |
| Bccel_0904 | GH94-X91              | 0.064        | <b>0.421</b> | 0.013        | <b>0.169</b> | 0.038    | 0.045     | 0.018     | 0.042      |
| Bccel_0905 | GH3                   | 0.000        | 0.082        | 0.000        | 0.027        | 0.000    | 0.006     | 0.000     | 0.004      |
| Bccel_0909 | CBM4-X229-GH9         | 0.081        | 0.046        | 0.056        | 0.077        | 0.038    | 0.009     | 0.045     | 0.023      |
| Bccel_0913 | X60-Doc               | <b>0.182</b> | <b>0.123</b> | <b>0.167</b> | <b>0.166</b> | 0.146    | 0.025     | 0.209     | 0.059      |
| Bccel_0917 | CBM35-GH26-Doc        | 0.093        | 0.056        | 0.081        | 0.065        | 0.021    | 0.003     | 0.031     | 0.007      |
| Bccel_0922 | X139-CBM4-Doc         | 0.003        | 0.041        | 0.004        | <b>0.121</b> | 0.002    | 0.003     | 0.003     | 0.012      |
| Bccel_0923 | Doc-(X159)16          | 0.016        | 0.009        | 0.028        | 0.024        | 0.007    | 0.001     | 0.020     | 0.004      |
| Bccel_2732 | CBM4-X229-GH9-Doc     | 0.007        | 0.024        | 0.032        | <b>0.170</b> | 0.005    | 0.005     | 0.031     | 0.035      |
| Bccel_2733 | CBM4-X229-GH9-Doc     | 0.035        | 0.072        | <b>0.125</b> | <b>0.254</b> | 0.021    | 0.010     | 0.114     | 0.053      |
| Bccel_2734 | GH9-Doc               | 0.028        | <b>0.206</b> | 0.055        | <b>0.522</b> | 0.003    | 0.004     | 0.010     | 0.016      |
| Bccel_2735 | CBM4-X229-GH9         | 0.025        | <b>0.197</b> | 0.063        | <b>0.588</b> | 0.011    | 0.019     | 0.040     | 0.106      |
| Bccel_3613 | CBM4-X229-GH9-Doc     | 0.027        | 0.061        | 0.022        | 0.074        | 0.011    | 0.006     | 0.013     | 0.013      |
| Bccel_3614 | CBM4-X229-GH9-Doc     | 0.045        | 0.069        | 0.057        | 0.077        | 0.020    | 0.010     | 0.042     | 0.018      |
| Bccel_3615 | CBM4-X229-GH9-Doc     | 0.018        | 0.013        | 0.016        | 0.029        | 0.010    | 0.002     | 0.011     | 0.006      |
| Bccel_3616 | CBM4-X229-GH9-Doc     | 0.054        | 0.089        | 0.053        | <b>0.150</b> | 0.029    | 0.011     | 0.041     | 0.025      |
| Bccel_3617 | GH9-Doc               | 0.001        | 0.000        | 0.002        | 0.003        | 0.000    | 0.000     | 0.001     | 0.000      |
| Bccel_3618 | CBM4-X229-GH9         | 0.013        | 0.027        | 0.018        | 0.028        | 0.004    | 0.002     | 0.007     | 0.004      |
| Bccel_5620 | CE12-Doc              | 0.178        | 0.196        | 0.117        | 0.132        | 0.034    | 0.011     | 0.037     | 0.012      |
| Bccel_5621 | X70-CE12-Doc          | 0.024        | 0.263        | 0.025        | 0.187        | 0.009    | 0.017     | 0.017     | 0.022      |
| Bccel_5625 | X3-X139-Doc           | 0.004        | 0.009        | 0.009        | 0.020        | 0.002    | 0.001     | 0.005     | 0.002      |
| Bccel_5626 | X3-X139-Doc           | 0.001        | 0.029        | 0.002        | 0.051        | 0.000    | 0.002     | 0.001     | 0.007      |
| Bccel_5627 | PL11_1-Doc            | 0.101        | 0.308        | 0.054        | 0.285        | 0.034    | 0.021     | 0.036     | 0.030      |
|            |                       |              |              |              | 0            | 0.001    | 0.01      | 0.1       | 1          |
